# Supplementary material for: Analysis of Pancreatic Cancer Microenvironment: Role of Macrophage Infiltrates and Growth Factors Expression
Source: PubMed Central journal article supplement — J Cancer. 2012 Jul 1;3:285–91. doi: 10.7150/jca.4537 (PMC3390598; doi:10.7150/jca.4537), 2012-07-01
Supplement: jcav03p0285s1.pdf [file jcav03p0285s1.pdf]

List of used antibodies.

| Antibody             | Manufactured by                            |
|----------------------|--------------------------------------------|
| EGF (Z-19)           | Santa Cruz Biotechnology, Santa Cruz , USA |
| EGFR (EGF-R2)        | Santa Cruz Biotechnology, Santa Cruz , USA |
| FGF2 (H-131)         | Santa Cruz Biotechnology, Santa Cruz , USA |
| FGF7 (H-73)          | Santa Cruz Biotechnology, Santa Cruz , USA |
| IGF1 (H-70)          | Santa Cruz Biotechnology, Santa Cruz , USA |
| IGF1R $\beta$ (C-20) | Santa Cruz Biotechnology, Santa Cruz , USA |
| HGF $\alpha$ (H-145) | Santa Cruz Biotechnology, Santa Cruz , USA |
| cMET (C-12)          | Santa Cruz Biotechnology, Santa Cruz , USA |
| PDGF B (N-30)        | Santa Cruz Biotechnology, Santa Cruz , USA |
| CD3 (F7.2.38)        | Dako, Glostrup, Dania                      |
| CD68 (EBM11)         | Dako, Glostrup, Dania                      |
| CD56 (123C3)         | Dako, Glostrup, Dania                      |
| Elastase (NP57)      | Dako, Glostrup, Dania                      |
| Lyve1(102-PA50)      | RELIATech, Wolfenbüttel, Niemcy            |
| Prox1(102-PA30S)     | RELIATech, Wolfenbüttel, Niemcy            |
| Podoplanin(101-M40)  | RELIATech, Wolfenbüttel, Niemcy            |
| VEGF C (H-190)       | Santa Cruz Biotechnology, Santa Cruz , USA |
| Flt4 (C-20)          | Santa Cruz Biotechnology, Santa Cruz , USA |
| CCL21(AF366)         | R&D Systems, Minneapolis, USA              |
| CCR7 (MAB197)        | R&D Systems, Minneapolis, USA              |
| CXCL13 (AF801)       | R&D Systems, Minneapolis, USA              |
| CXCR5 (MAB190)       | R&D Systems, Minneapolis, USA              |
| CD31(M0823)          | Dako, Glostrup, Dania                      |
| FVIII (M0616)        | Dako, Glostrup, Dania                      |

Table S1. Antibodies used for immunohistochemistry.
